# Supplementary material
Source: Springer Nature journal article supplement (https://www.springermedizin.de/resource/supplementary/12885_2011_2796_MOESM1_ESM.pdf/9462006)
Supplement: MOESM1 [file 9462006]

**ASSESSMENT FOR ELIGIBILITY**  
SCC / ADENOCARCINOMA  
MIDDLE / LOWER THIRD OF THORACIC ESOPHAGUS  
ELIGIBLE FOR IVOR-LEWIS PROCEDURE

CONTRAINDICATION  
TO SURGERY

NO RANDOMIZATION

**LAPAROSCOPIC EXPLORATION**

ELIGIBLE FOR SURGERY

**RANDOMIZATION**

**ARM A**  
**HMIE**

**ARM B**  
**Open**

LAPAROSCOPIC GASTRIC MOBILIZATION  
OPEN THORACIC ESOPHAGECTOMY

OPEN GASTRIC MOBILIZATION  
OPEN THORACIC ESOPHAGECTOMY

**PRIMARY ENDPOINT**  
30-DAYS MAJOR MORBIDITY

**FOLLOW-UP**  
30 days and every 6 months during 3 years  
30-days mortality and global morbidity / disease-free survival (DFS) / overall survival (OS) / quality of life
